# Supplementary material
Source: Springer Nature journal article supplement (https://www.springermedizin.de/resource/supplementary/12891_2008_481_MOESM9_ESM.pdf/9511532)

Review: Laser tendinopathy  
 Comparison: 05 Lateral elbow tendinopathy pain  
 Outcome: 04 Follow-up 3-8 weeks after end of treatment pain on VAS

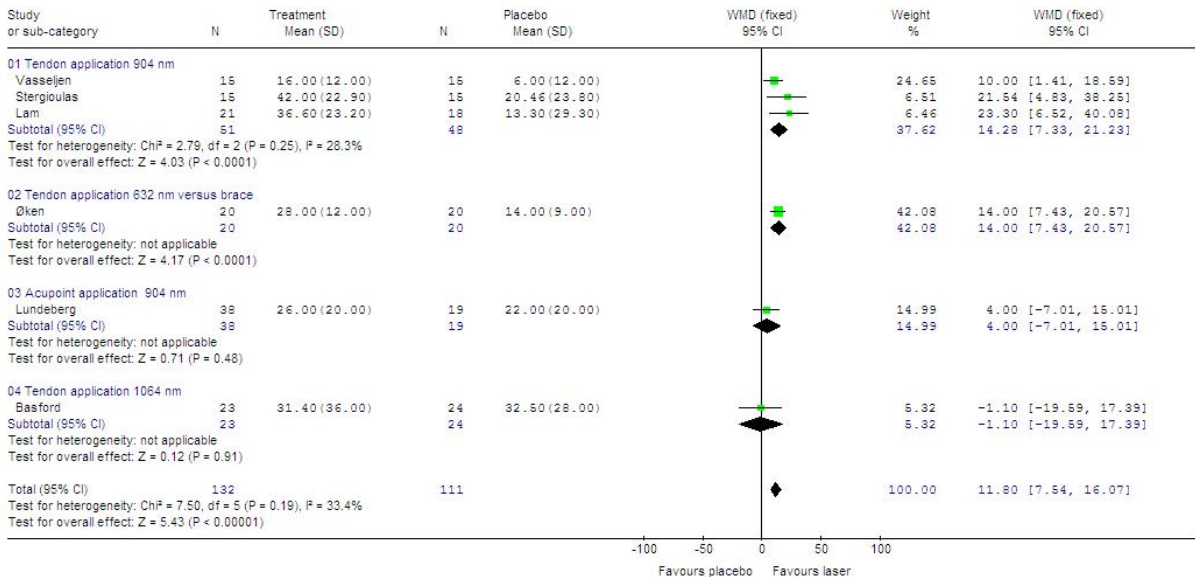

Supplement: MOESM9 [file 9511532]
